# Supplementary material
Source: PubMed Central journal article supplement (PMC7919729)

## **Supplemental Figure Legends**

### **Figure S1. CoQ-deficient mice show histologic evidence of kidney injury at five months.**

**A.** Electron micrographs of kidneys of CTRL and KDKD mice show diffuse podocyte foot process effacement (arrowheads) in glomeruli of KDKD mice; Pod, podocyte; PEC, parietal epithelial cell; Mes, mesangial cell; EC, endothelial cell; RBC, red blood cell; CL, capillary lumen; BS, Bowman's space; FP, podocyte foot processes. **B, C.** Quality control measures of sNuc-Seq by sample. **D.** UMAP visualization of single nucleus transcriptomic profiles from three five-month-old *Pdss2<sup>kd/kd</sup>* mice (KDKD) and three age-matched control mice (CTRL) color-coded by sample.

### **Figure S2. sNuc-Seq of CoQ-deficient and age-control mice retrieve all expected major kidney cell types.**

Violin plot representation of gene expression of canonical marker genes for different kidney cell types across all clusters.

### **Figure S3. sNuc-Seq of CoQ-deficient and age-control mice reveal disease-specific populations.**

**A.** Proportions of clusters by sample (left) with corresponding cell numbers (right). **B.** Violin plot expression of TAL (*Slc12a1*), DCT (*Slc12a3*) canonical markers with *Dcdc2a* (top), and expression of three genes by UMAP representation only in Mixed-TAL/DCT cluster (bottom).

**Figure S4. *Dock10/Vcam1*<sup>+</sup> PEC population identified in CoQ-deficient mice.**

**A.** Volcano plot of genes based on enrichment in *Dock10/Vcam1*<sup>+</sup> cluster colored by significance (black, p-adj. < 0.05, Wilcox rank sum test) and selected genes (red). **B.** Dot plot representation of gene expression of canonical marker genes for parietal epithelial cells (PECs). Note *Dock10/Vcam1*<sup>+</sup> cells uniquely co-express the PEC markers *CD44*, *Pax8* and *Cldn1*. **C.** Correlation plot of average gene expression across clusters show *Dock10/Vcam1*<sup>+</sup> cells most similar to proximal tubule (PT) cells. **D.** Immunofluorescence staining for PT (*Lrp2*) and *Vcam1* in CTRL versus KDKD mice shows increased *Vcam1* expression in KDKD (left; scale bars, 500  $\mu$ m). Higher magnification shows *Vcam1* co-localization with *Lrp2*<sup>+</sup> PT cells (right; scale bars, 50  $\mu$ m). **E.** Immunofluorescence staining for podocytes (*Synpo*) and *Vcam1* in CTRL versus KDKD mice shows BC localization surrounding *Synpo*<sup>+</sup> glomeruli; scale bars, 50  $\mu$ m. **F.** *In situ* hybridization chain reaction shows co-localization of *Dock10* and *Vcam1* mRNA in cells surrounding podocytes (*Nphs2*), scale bars, 20  $\mu$ m. **G.** Immunofluorescence staining for podocytes (*Synpo*), PEC activation (*Cd44*) and *Vcam1* in KDKD mice shows BC and PEC localization surrounding *Synpo*<sup>+</sup> glomeruli; scale bars, 50  $\mu$ m. **H.** Immunofluorescence staining for podocytes (*Synpo*), PEC activation (*Cd44*) and PECs (*Cldn1*) in CTRL versus KDKD mice shows BC localization of *Cldn1*<sup>+</sup> PECs surrounding *Synpo*<sup>+</sup> glomeruli with *Cd44* PEC-activation only in KDKD mice; scale bars, 50  $\mu$ m.

**Figure S5. Podocytes in *Pdss2*<sup>kd/kd</sup> mice have podocyte injury, increased ETC expression and proteinuria by four months of age.**

**A.** Periodic acid–Schiff (PAS) staining of kidneys from CTRL and KDKD mice showing proteinuric casts in tubules of KDKD mice (\*) and activation of PECs (arrowheads) at higher magnification, as seen by increased numbers and more prominent nucleoli. **B.** Gene expression of canonical podocyte marker genes (Synaptopodin (Synpo), Wt1, Plce1) in podocytes from control and *Pdss2*<sup>kd/kd</sup> mice. **C.** Heatmap of average gene expression of electron transport genes (Complex I-IV) across podocyte and combined proximal tubules cells in CTRL versus KDKD mice. **D.** Average age of animals used for GDC-0879 treatment (top) and day 1 proteinuria levels (bottom).

**Figure S6. *Pdss2* knockdown in podocytes leads to CoQ deficiency but no alteration in known CoQ functions.**

**A.** Western blot from *Pdss2* shRNA infected podocytes or scrambled controls five days post-lentivirus infection. **B.** Log<sub>2</sub> fold change of CoQ levels (CoQ9 and CoQ10) in *Pdss2* shRNA infected podocytes compared to scrambled controls, n=4. **C,D.** Mitostress test to assess electron transport chain (ETC) function by oxygen consumption rate (OCR, top) and glycolysis by extracellular acidification rate (ECAR, bottom) with the Seahorse Flux Analyzer in *Pdss2* shRNA infected podocytes and scrambled controls in **C.** full RPMI media (11.1 mM glucose) or **D.** glucose-free RPMI. **E.** Log<sub>2</sub> fold change of uridine levels in *Pdss2* shRNA infected podocytes compared to scrambled controls, n=4. **F.** Transition pore opening as measured by Calcein-AM in the presence of CoCl<sub>2</sub>, normalized to total mitochondrial abundance, measured by MitoTracker Deep Red in *Pdss2* shRNA infected podocytes and scrambled controls, n=4, one-way ANOVA, Tukey multiple comparison test. **G.** Cellular ROS as measured by the sum fluorescence

of CellROX Orange dye in Pdss2-depleted podocytes and scrambled controls, n=4, one-way ANOVA, Tukey multiple comparison test.

**Figure S7. Metabolomics of Pdss2-depleted podocytes show increased abundance of polyunsaturated triglycerides and decreased abundance of polyunsaturated phospholipids.**

**A.** Heatmap of statistically significant metabolites (FDR <10%, Benjamini-Hochberg correction on a student's t-test) from cell extracts of Pdss2 shRNA infected podocytes compared to scrambled controls, n=4. **B.** Lipidomic analysis across 14 lipid classes demonstrate significant changes in plasmalogens, sphingomyelin, and triglycerides between Pdss2 shRNA infected podocytes compared to scrambled controls. CE, cholesterol ester; DAG, diacylglyceride; LPC, lyso-phosphocholine; LPE, lyso-phosphoethanolamine; MAG, monoacylglyceride; PC, phosphocholine; PE, phosphoethanolamine; PI, phosphoinositol; PL, phospholipid; PS, phosphoserine; SM, sphingomyelin; TAG, triacylglyceride. **C.** Log2 fold changes of sum of abundances of triglycerides sub-divided based on degree of saturation in Pdss2-depleted podocytes compared to scrambled controls.

**Figure S8. GGdP increases Rar-mediated transcription in a dose-responsive manner, CoQ-deficient mice reveal podocyte-specific changes in PUFA-related genes, and Gpx4 immunofluorescence quantification.**

Luminescence readout from a Retinoic Acid Receptor Element (RARE)-luciferase reporter assay following 24 hours treatment with **A.** atRA, n=3 or **B.** GGdP, n=6,

showing that both increase Rar-mediated transcription in a dose-responsive manner. **C.** Western blot of phospho-ERK1/2 (P-ERK1/2) and total ERK1/2 which shows decreased ERK1/2 phosphorylation following treatment with thapsigargin (2.5  $\mu$ M) and reversed with GDC-0879 (10  $\mu$ M). **D.** Heatmap of average gene expression of genes used to create PUFA transcriptomic signatures in original dataset of 61 free fatty acids in MIN6 cells, demonstrating selected genes are either up- or down-regulated specifically among PUFAs. **E.** Heatmap of average gene expression of genes used to create the PUFA upregulated gene signature (PUFA up) and PUFA downregulated gene signature (PUFA down) across podocyte and combined proximal tubule cells in control versus *Pdss2<sup>kd/kd</sup>* mice.

**Figure S9. Image analysis using Opera Phenix High-Content Screening System and Harmony software.**

**A.** Analysis of immunofluorescence by Harmony software demonstrating identification of glomeruli, based on Synpo expression, and surrounding regions for Gpx4 quantification. **B.** Immunofluorescence of synaptopodin (Synpo, red) with nuclei staining (DAPI, blue) and quantification by cell size showing larger cells have increased expression of synaptopodin (SYNPO) suggesting further podocyte maturation; scale bars, 100  $\mu$ m. **C.** Analysis of live cell imaging by Harmony software demonstrating identification of cell bodies, selection of cells based on size, and selection of apoptotic (caspase positive) and dead cells. **D.** Dose-response curve for GDC-0879 inhibition of podocyte apoptosis in vitro, n=4, IC50 for each condition determined using a nonlinear least squares fit.

## **Supplementary Tables**

**Supplementary Table 1:** Marker gene lists for all identified clusters

**Supplementary Table 2:** Differential expression (DE) list and gene set enrichment analysis (GSEA) on CTRL versus KDKD podocyte DE

**Supplementary Table 3:** Metabolomics data and differential abundance (DA) analysis for all annotated metabolites from conditioned media and cell lysates for scrambled controls and Pdss2

**Supplementary Table 4:** Differential expression (DE) and gene set enrichment analysis (GSEA) of bulk RNA-seq data comparing scrambled controls and Pdss2 shRNAs

**Supplementary Table 5:** Metabolomics data and differential abundance (DA) analysis for all detected metabolites from conditioned media with atRA treatment versus DMSO control

**Supplementary Table 6:** Product information for reagents, antibodies, and primer sequences

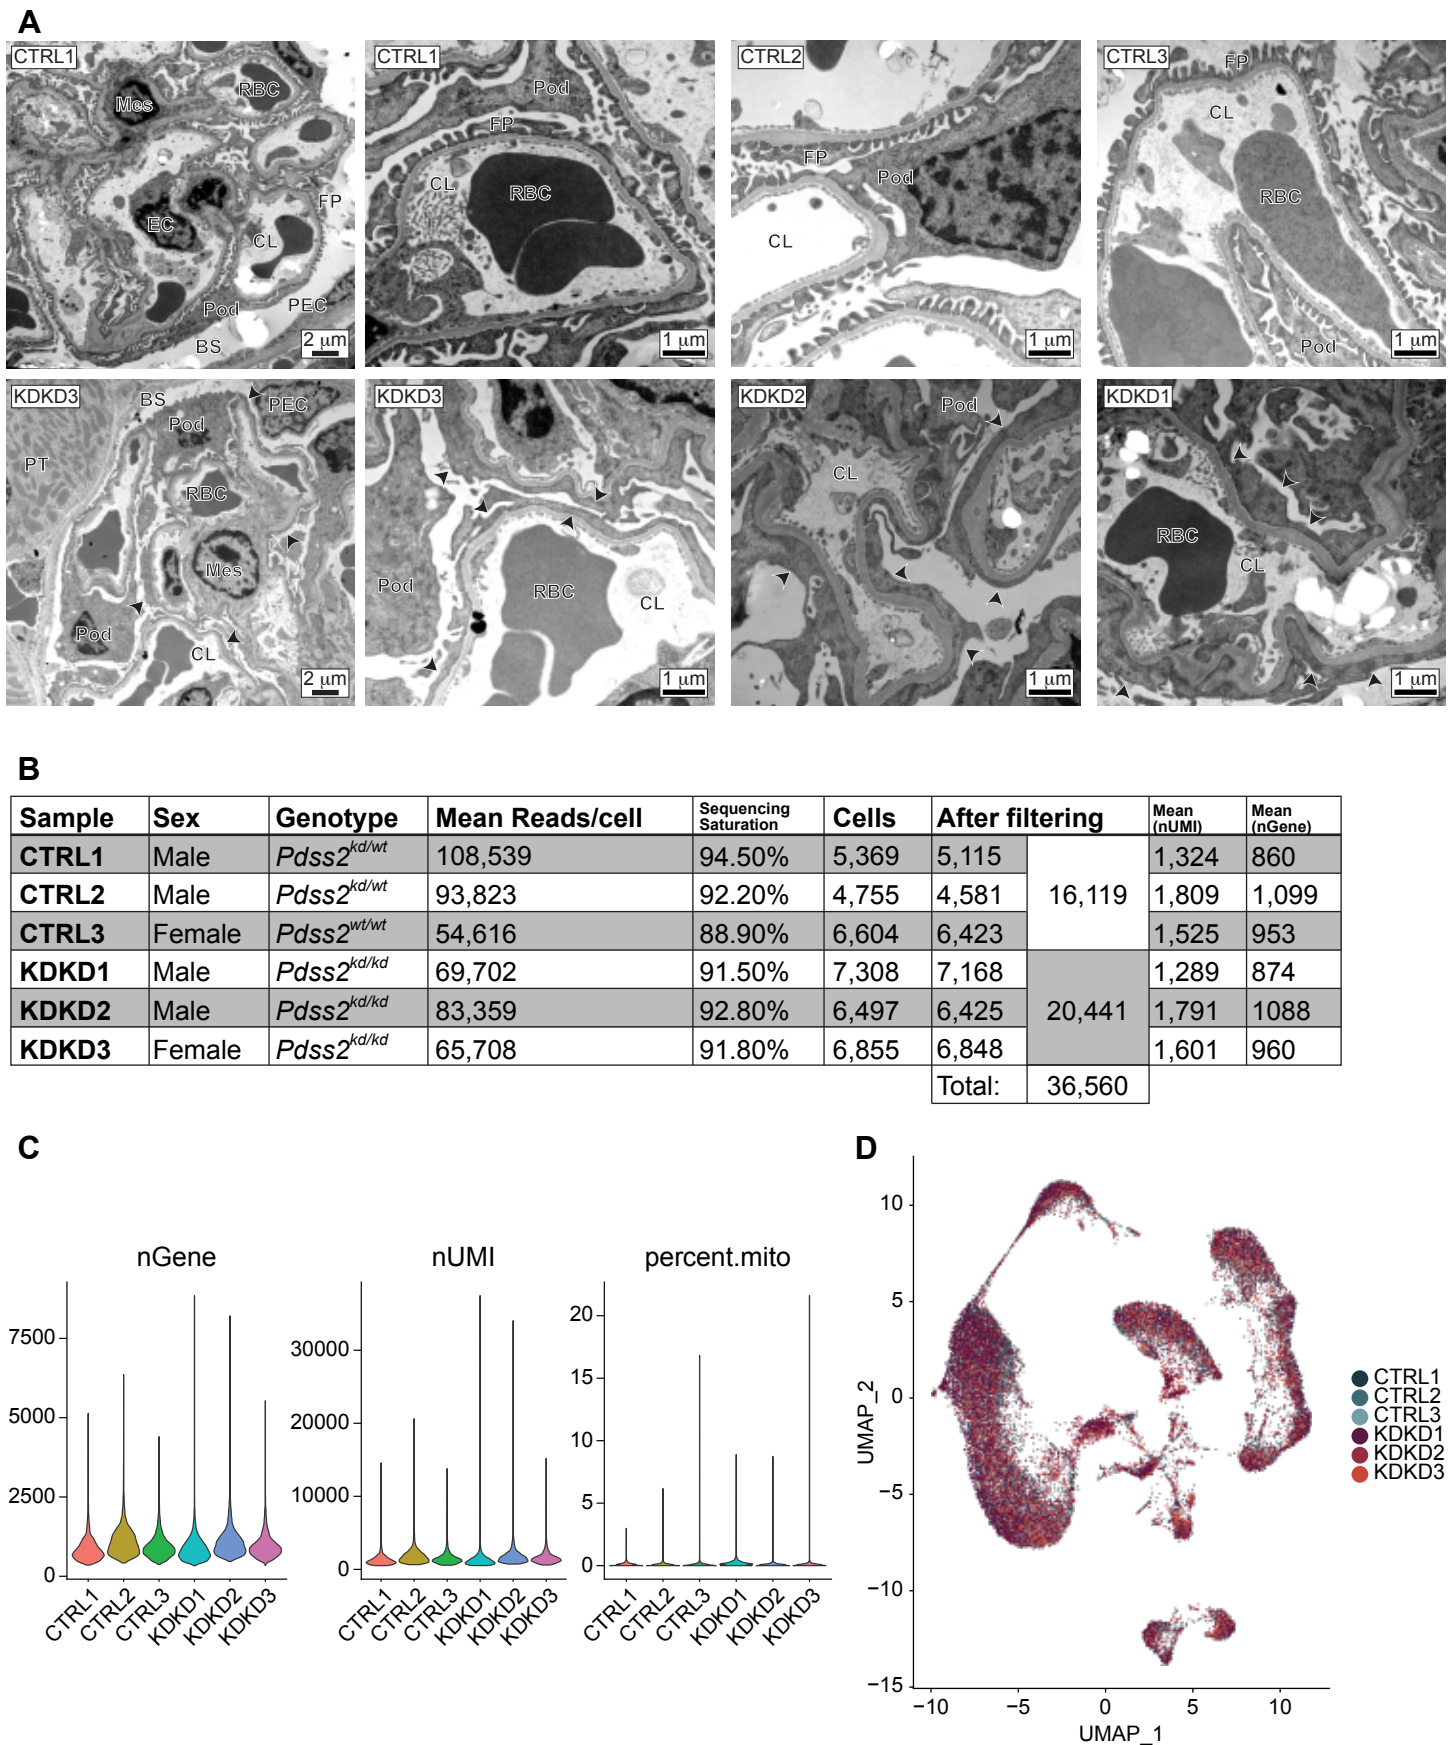

**Figure S1. CoQ-deficient mice show histologic evidence of kidney injury at five months.**

**A.** Electron micrographs of kidneys of CTRL and KDKD mice show diffuse podocyte foot process effacement (arrowheads) in glomeruli of KDKD mice; Pod, podocyte; PEC, parietal epithelial cell; Mes, mesangial cell; EC, endothelial cell; RBC, red blood cell; CL, capillary lumen; BS, Bowman's space; FP, podocyte foot processes. **B, C.** Quality control measures of sNuc-Seq by sample. **D.** UMAP visualization of single nucleus transcriptomic profiles from three five month old *Pdss2*<sup>kd/kd</sup> mice (KDKD) and three age-matched control mice (CTRL) color-coded by sample.

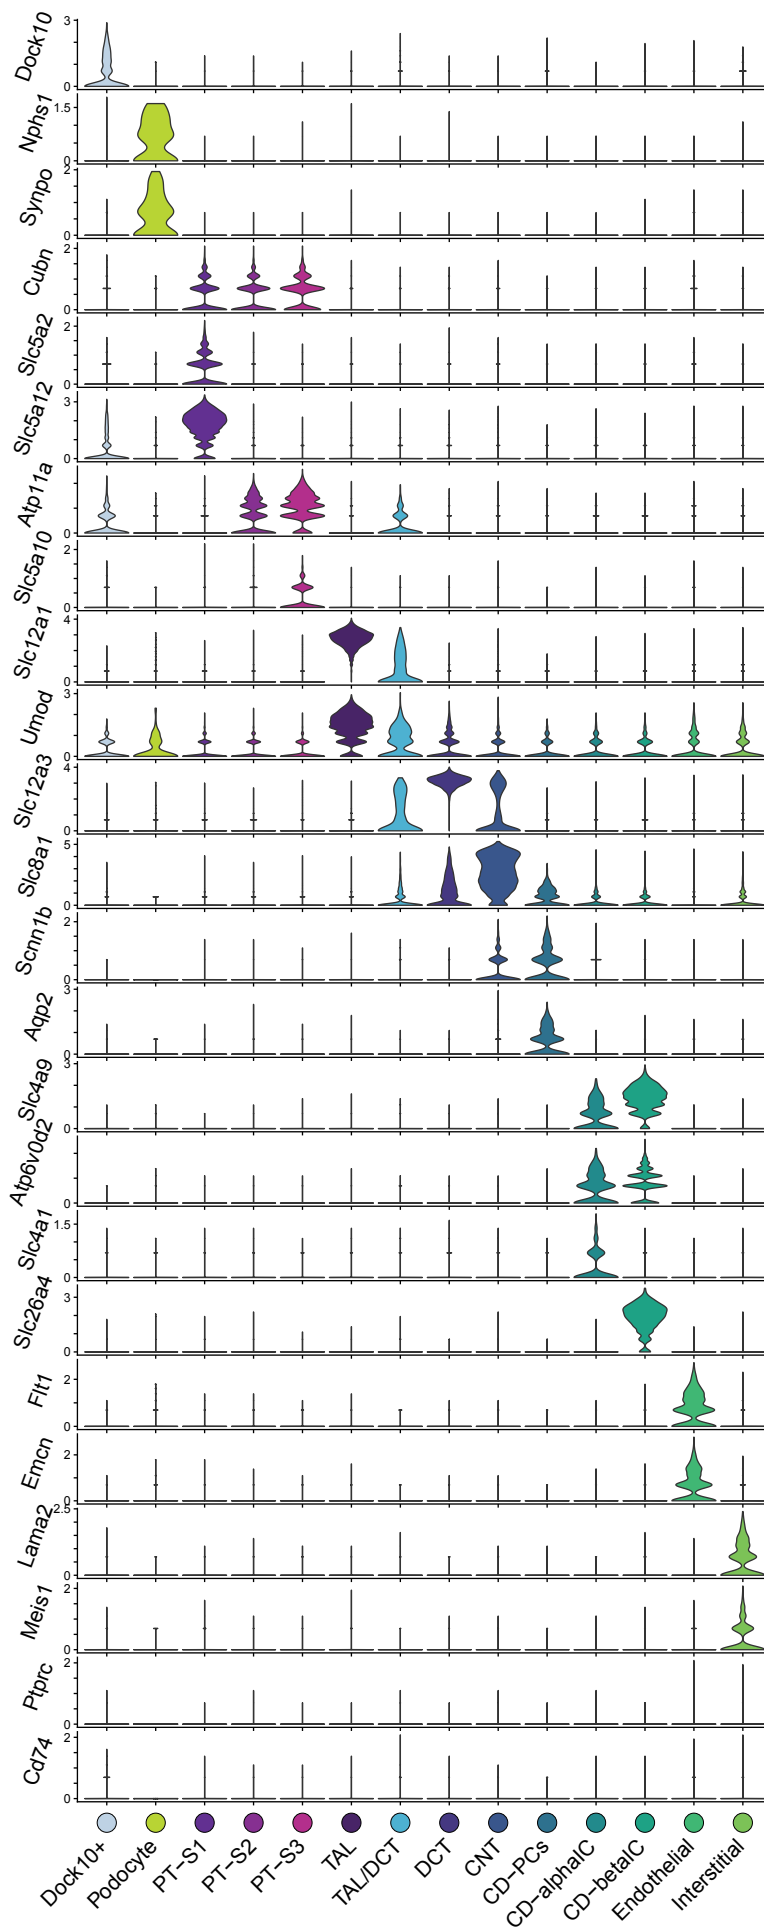

**Figure S2. sNuc-Seq of CoQ-deficient and age-control mice retrieve all expected major kidney cell types.** Violin plot representation of gene expression of canonical marker genes for different kidney cell types across all clusters.



A

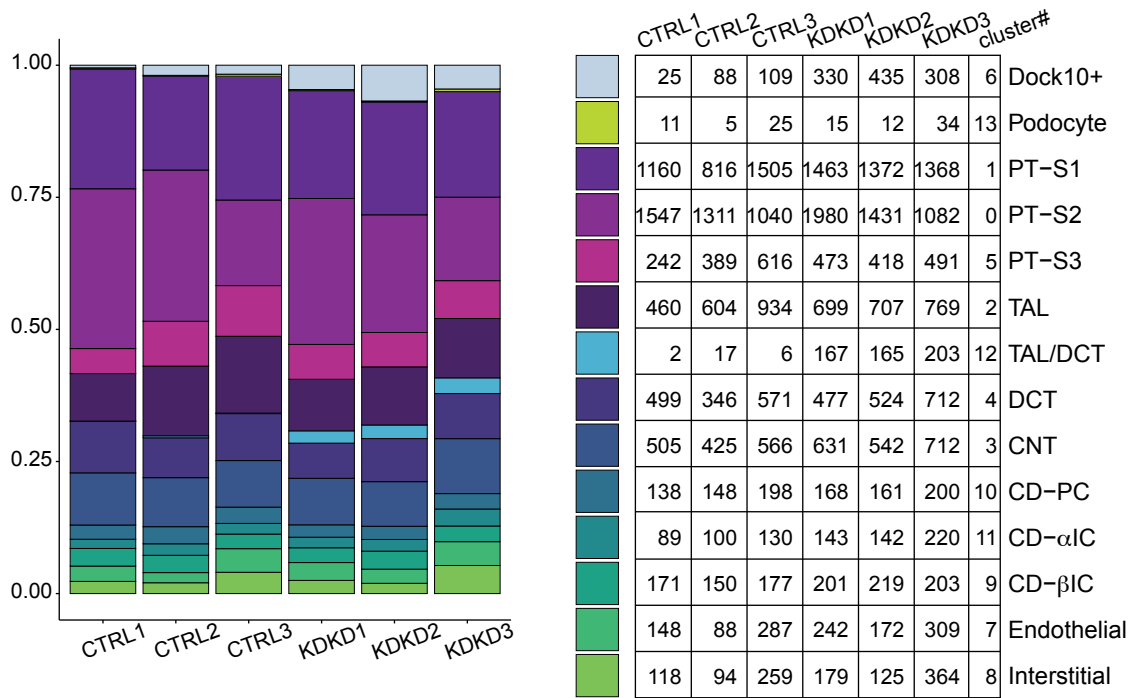

B

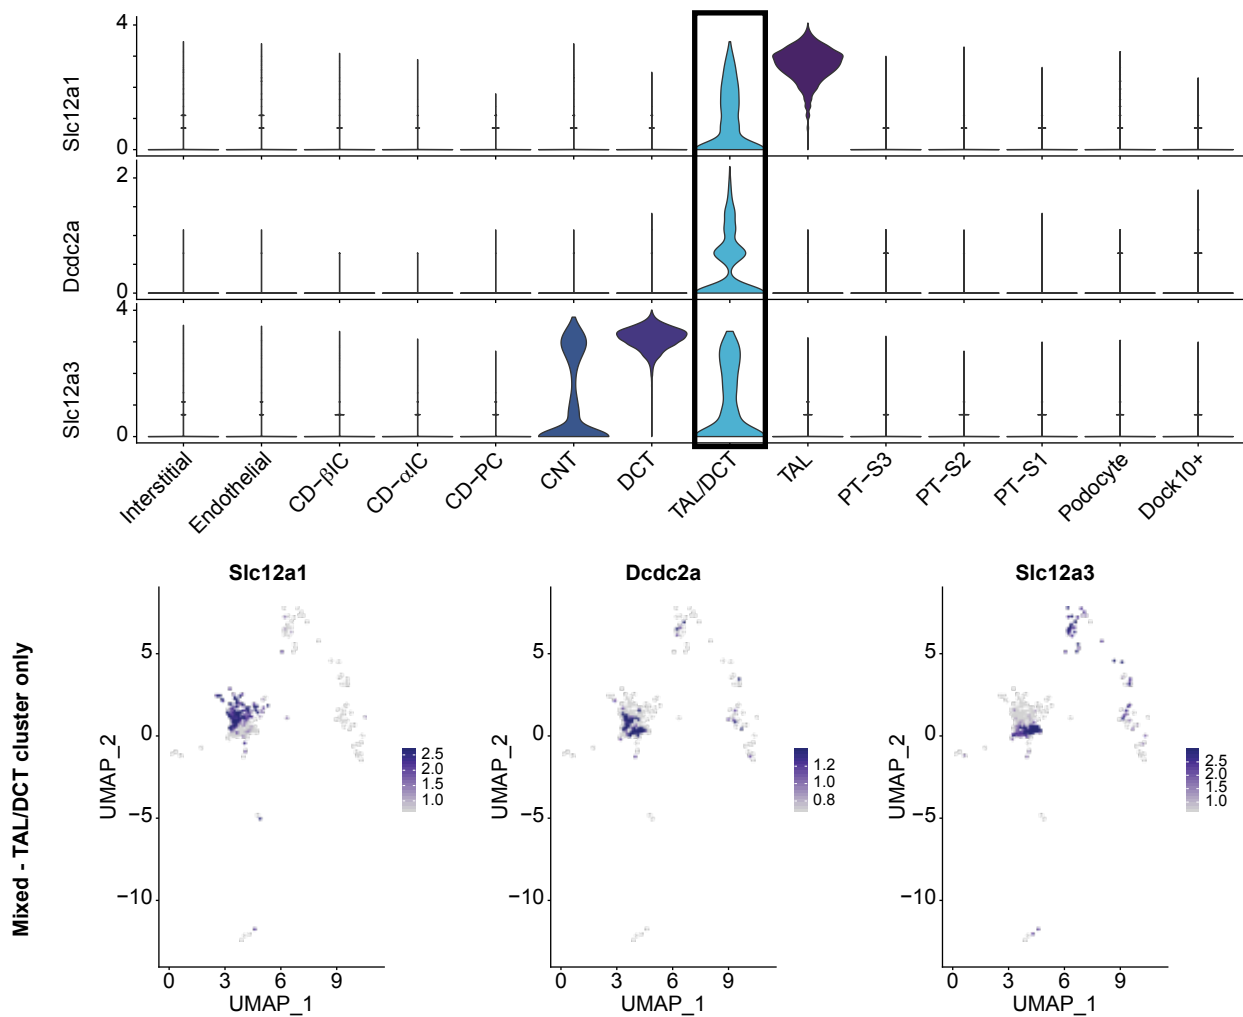

**Figure S3. sNuc-Seq of CoQ-deficient and age-control mice reveal disease-specific populations.**

**A.** Proportions of clusters by sample (left) with corresponding cell numbers (right). **B.** Violin plot expression of TAL (Slc12a1), DCT (Slc12a3) canonical markers with Dcdc2a (top), and expression of three genes by UMAP representation only in Mixed-TAL/DCT cluster (bottom).

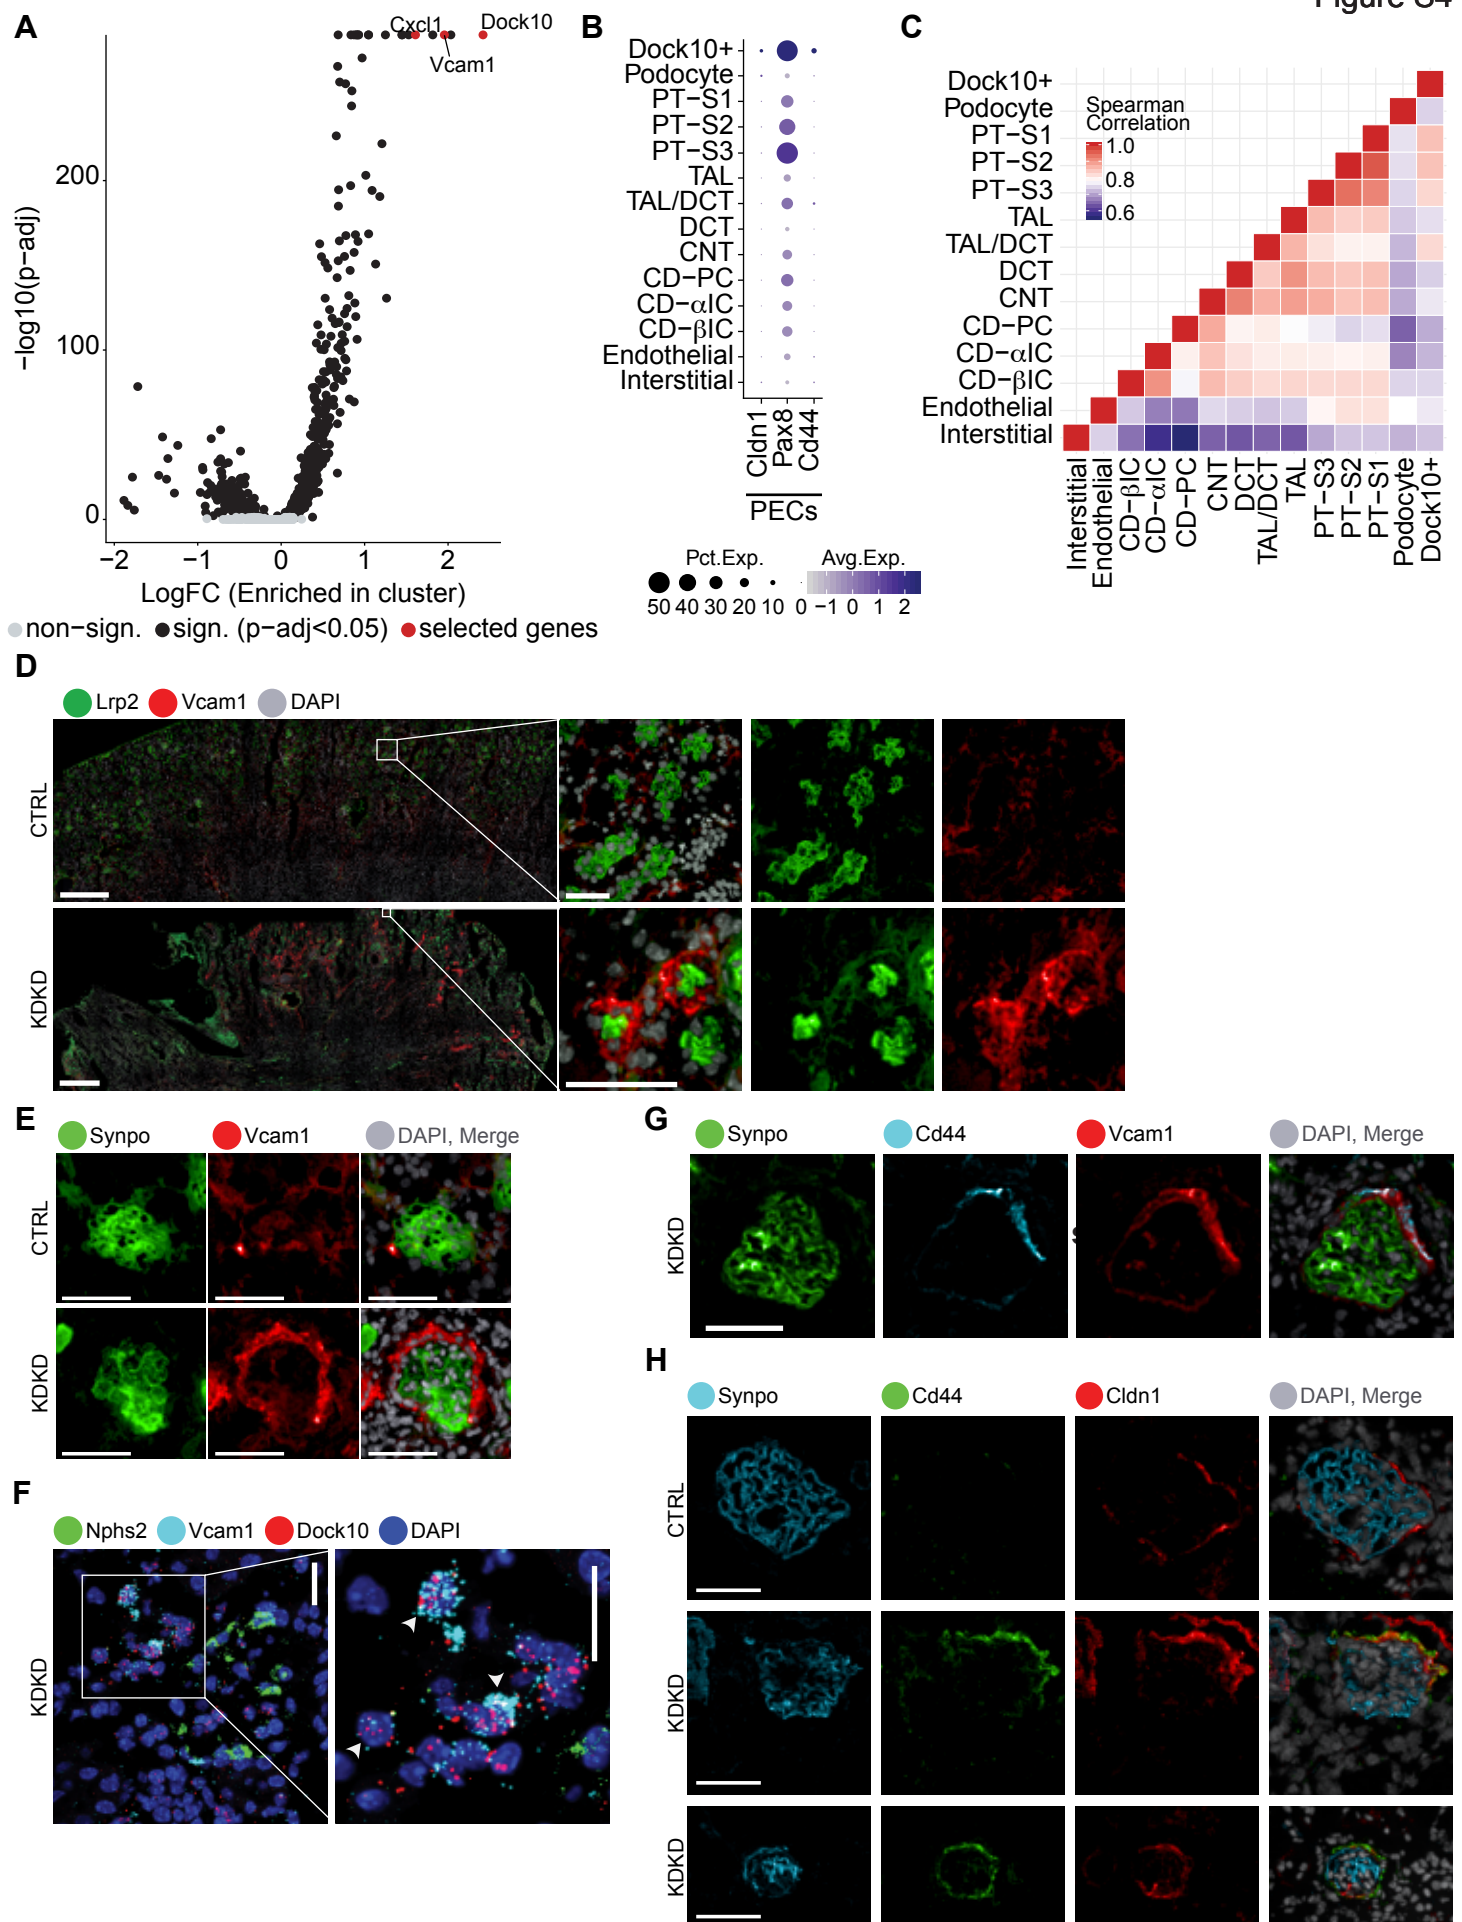

**Figure S4. Dock10/Vcam1<sup>+</sup> PEC population identified in CoQ-deficient mice.**

**A.** Volcano plot of genes based on enrichment in Dock10/Vcam1<sup>+</sup> cluster colored by significance (black,  $p\text{-adj.} < 0.05$ , Wilcox rank sum test) and selected genes (red). **B.** Dot plot representation of gene expression of canonical marker genes for parietal epithelial cells (PECs). Note Dock10/Vcam1<sup>+</sup> cells uniquely co-express the PEC markers CD44, Pax8 and Cldn1. **C.** Correlation plot of average gene expression across clusters show Dock10/Vcam1<sup>+</sup> cells most similar to proximal tubule (PT) cells. **D.** Immunofluorescence staining for PT (Lrp2) and Vcam1 in CTRL versus KDKD mice shows increased Vcam1 expression in KDKD (left; scale bars, 500  $\mu\text{m}$ ). Higher magnification shows Vcam1 co-localization with Lrp2<sup>+</sup> PT cells (right; scale bars, 50  $\mu\text{m}$ ). **E.** Immunofluorescence staining for podocytes (Synpo) and Vcam1 in CTRL versus KDKD mice shows BC localization surrounding Synpo<sup>+</sup> glomeruli; scale bars, 50  $\mu\text{m}$ . **F.** In situ hybridization chain reaction shows co-localization of Dock10 and Vcam1 mRNA in cells surrounding podocytes (Nphs2), scale bars, 20  $\mu\text{m}$ . **G.** Immunofluorescence staining for podocytes (Synpo), PEC activation (Cd44) and Vcam1 in KDKD mice shows BC and PEC localization surrounding Synpo<sup>+</sup> glomeruli; scale bars, 50  $\mu\text{m}$ . **H.** Immunofluorescence staining for podocytes (Synpo), PEC activation (Cd44) and PECs (Cldn1) in CTRL versus KDKD mice shows BC localization of Cldn1<sup>+</sup> PECs surrounding Synpo<sup>+</sup> glomeruli with Cd44 PEC-activation only in KDKD mice; scale bars, 50  $\mu\text{m}$ .

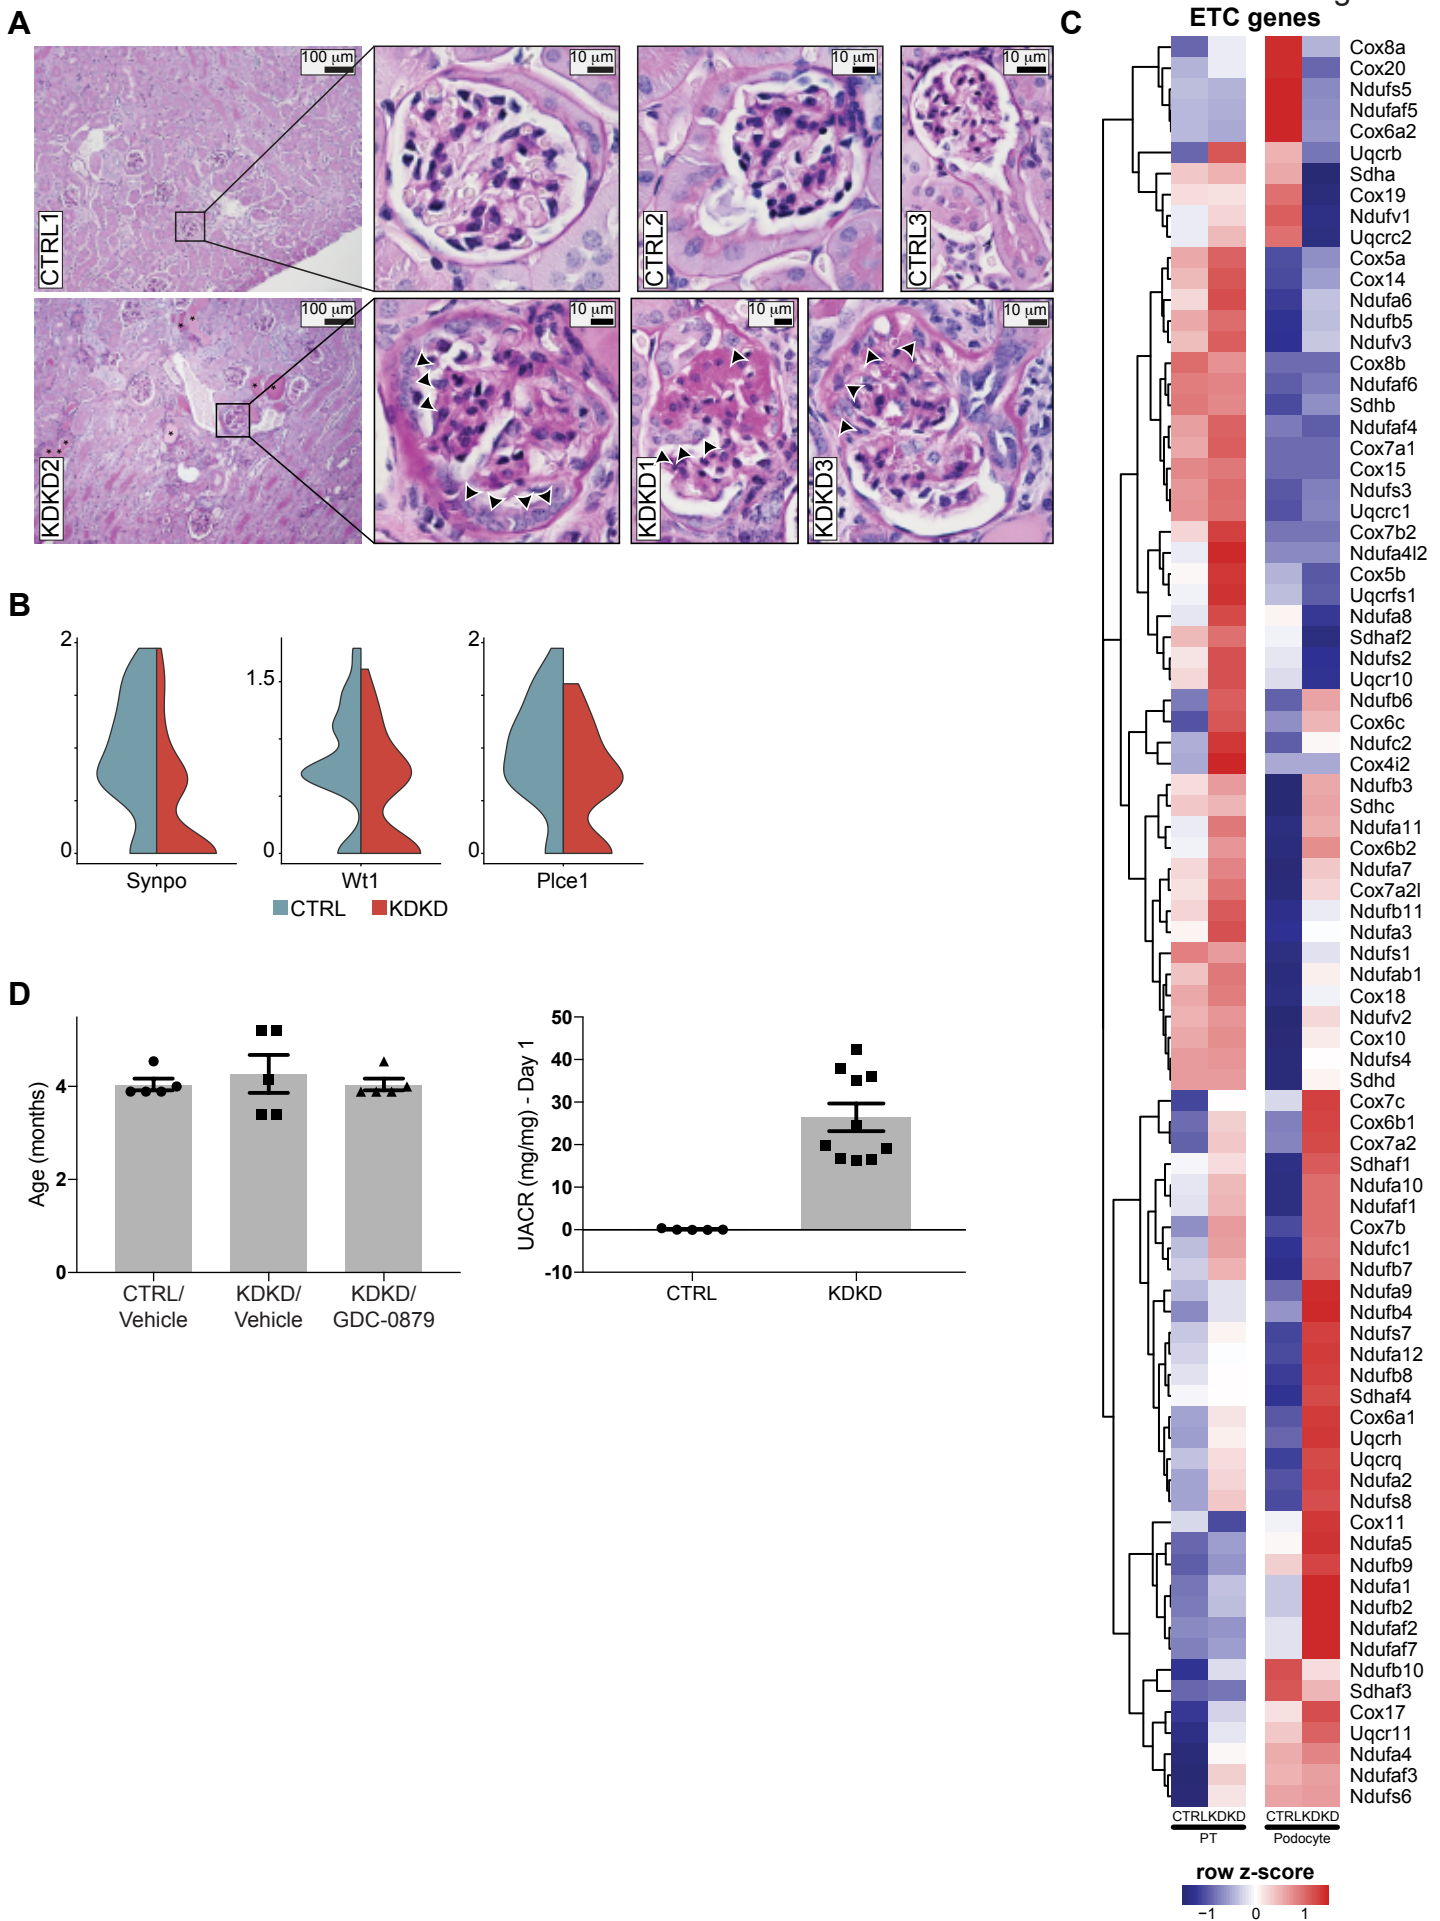

**Figure S5. Podocytes in *Pdss2<sup>kd/kd</sup>* mice have podocyte injury, increased ETC expression and proteinuria by four months of age.**

**A.** Periodic acid–Schiff (PAS) staining of kidneys from CTRL and KDKD mice showing proteinuric casts in tubules of KDKD mice (\*) and activation of PECs (arrowheads) at higher magnification, as seen by increased numbers and more prominent nucleoli. **B.** Gene expression of canonical podocyte marker genes (Synaptopodin (Synpo), Wt1, Plce1) in podocytes from control and *Pdss2<sup>kd/kd</sup>* mice. **C.** Heatmap of average gene expression of electron transport genes (Complex I–IV) across podocyte and combined proximal tubules cells in CTRL versus KDKD mice. **D.** Average age of animals used for GDC-0879 treatment (top) and day 1 proteinuria levels (bottom).

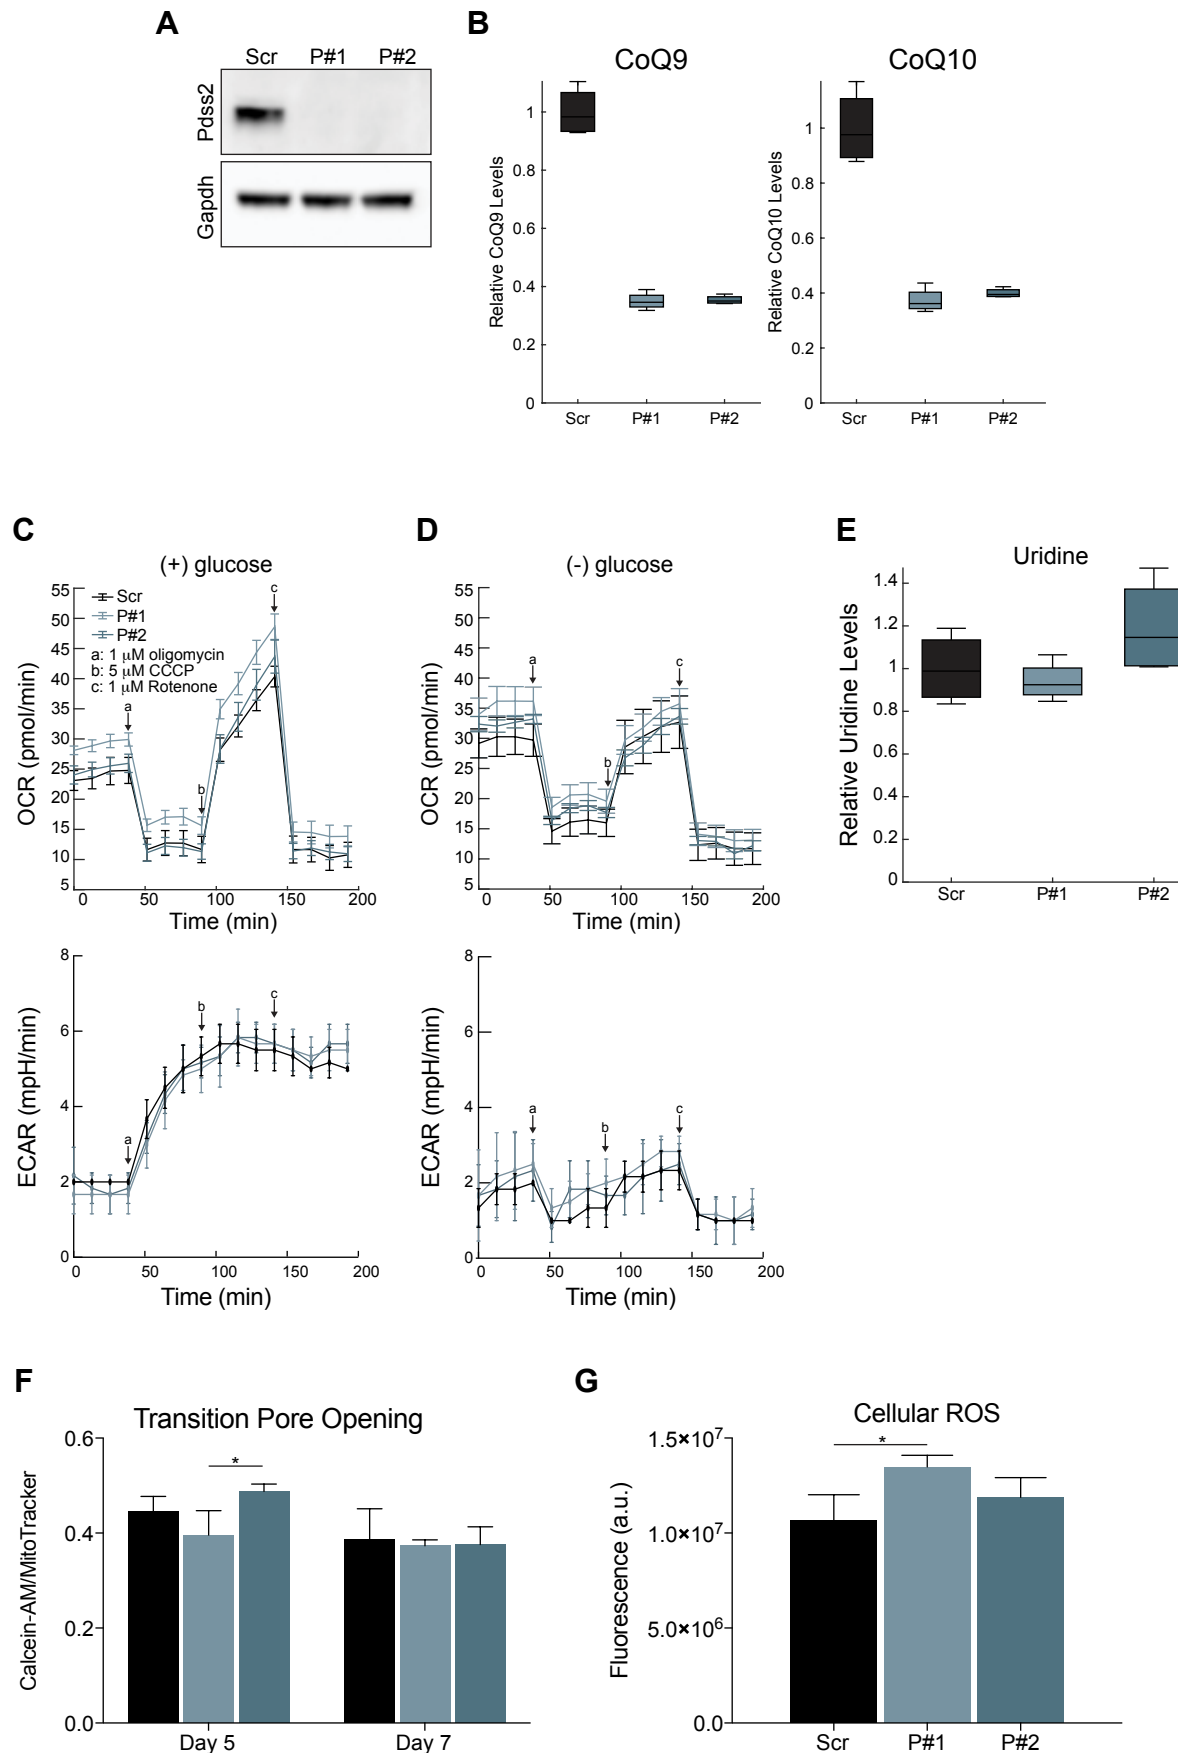

**Figure S6. Pdss2 knockdown in podocytes leads to CoQ deficiency but no alteration in known CoQ functions.**

**A.** Western blot from Pdss2 shRNA infected podocytes or scrambled controls five days post-lentivirus infection. **B.** Log<sub>2</sub> fold change of CoQ levels (CoQ9 and CoQ10) in Pdss2 shRNA infected podocytes compared to scrambled controls, n=4. **C, D.** Mito-stress test to assess electron transport chain (ETC) function by oxygen consumption rate (OCR, top) and glycolysis by extracellular acidification rate (ECAR, bottom) with the Seahorse Flux Analyzer in Pdss2 shRNA infected podocytes and scrambled controls in **C.** full RPMI media (11.1 mM glucose) or **D.** glucose-free RPMI. **E.** Log<sub>2</sub> fold change of uridine levels in Pdss2 shRNA infected podocytes compared to scrambled controls, n=4. **F.** Transition pore opening as measured by Calcein-AM in the presence of CoCl<sub>2</sub>, normalized to total mitochondrial abundance, measured by MitoTracker Deep Red in Pdss2 shRNA infected podocytes and scrambled controls, n=4, one-way ANOVA, Tukey multiple comparison test. **G.** Cellular ROS as measured by the sum fluorescence of CellROX Orange dye in Pdss2-depleted podocytes and scrambled controls, n=4, one-way ANOVA, Tukey multiple comparison test.

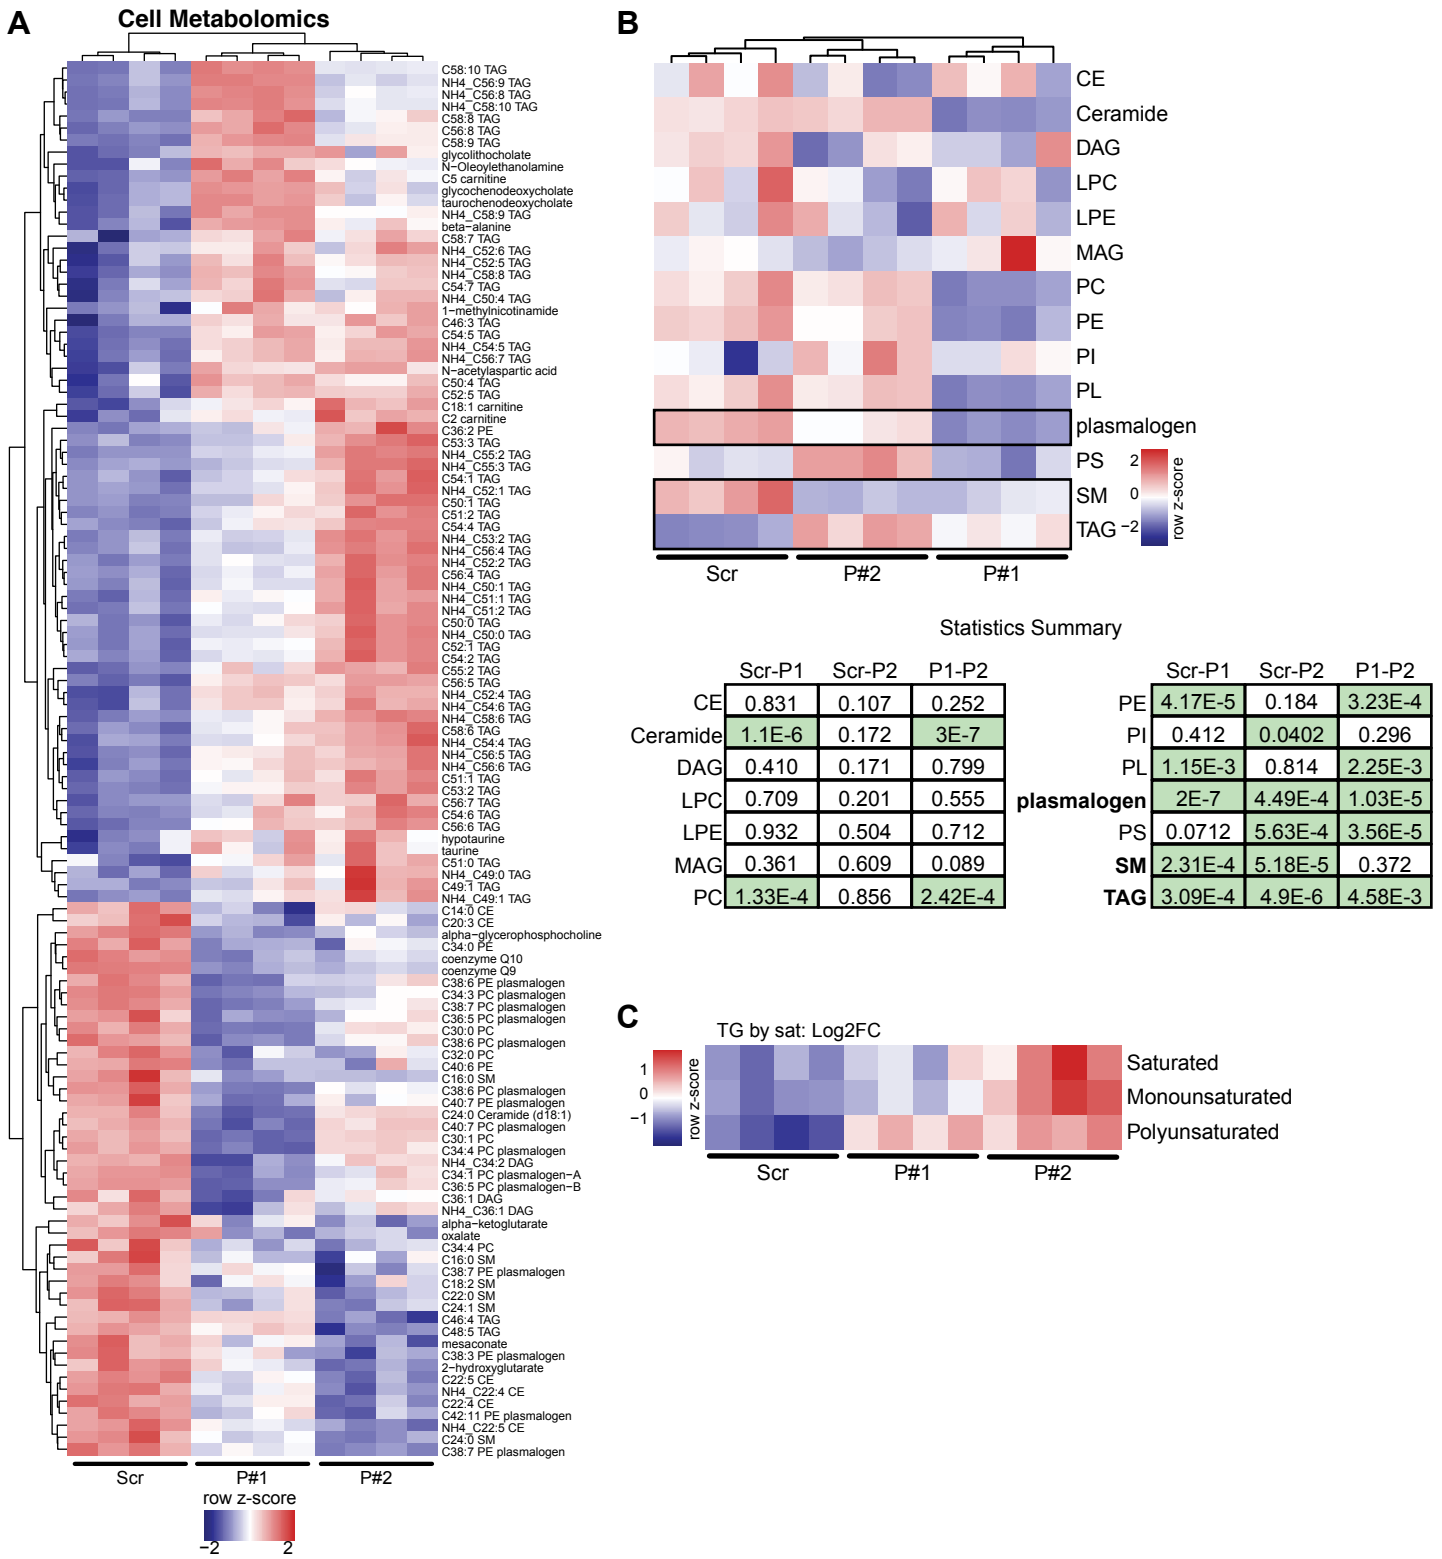

**Figure S7. Metabolomics of Pdss2-depleted podocytes show increased abundance of polyunsaturated triglycerides and decreased abundance of polyunsaturated phospholipids.**

**A.** Heatmap of statistically significant metabolites (FDR < 10%, Benjamini-Hochberg correction on a student's t-test) from cell extracts of Pdss2 shRNA infected podocytes compared to scrambled controls, n=4. **B.** Lipidomic analysis across 14 lipid classes demonstrate significant changes in plasmalogens, sphingomyelin, and triglycerides between Pdss2 shRNA infected podocytes compared to scrambled controls. CE, cholesterol ester; DAG, diacylglyceride; LPC, lyso-phosphocholine; LPE, lyso-phosphoethanolamine; MAG, monoacylglyceride; PC, phosphocholine; PE, phosphoethanolamine; PI, phosphoinositol; PL, phospholipid; PS, phosphoserine; SM, sphingomyelin; TAG, triacylglyceride. **C.** Log2 fold changes of sum of abundances of triglycerides sub-divided based on degree of saturation in Pdss2-depleted podocytes compared to scrambled controls.

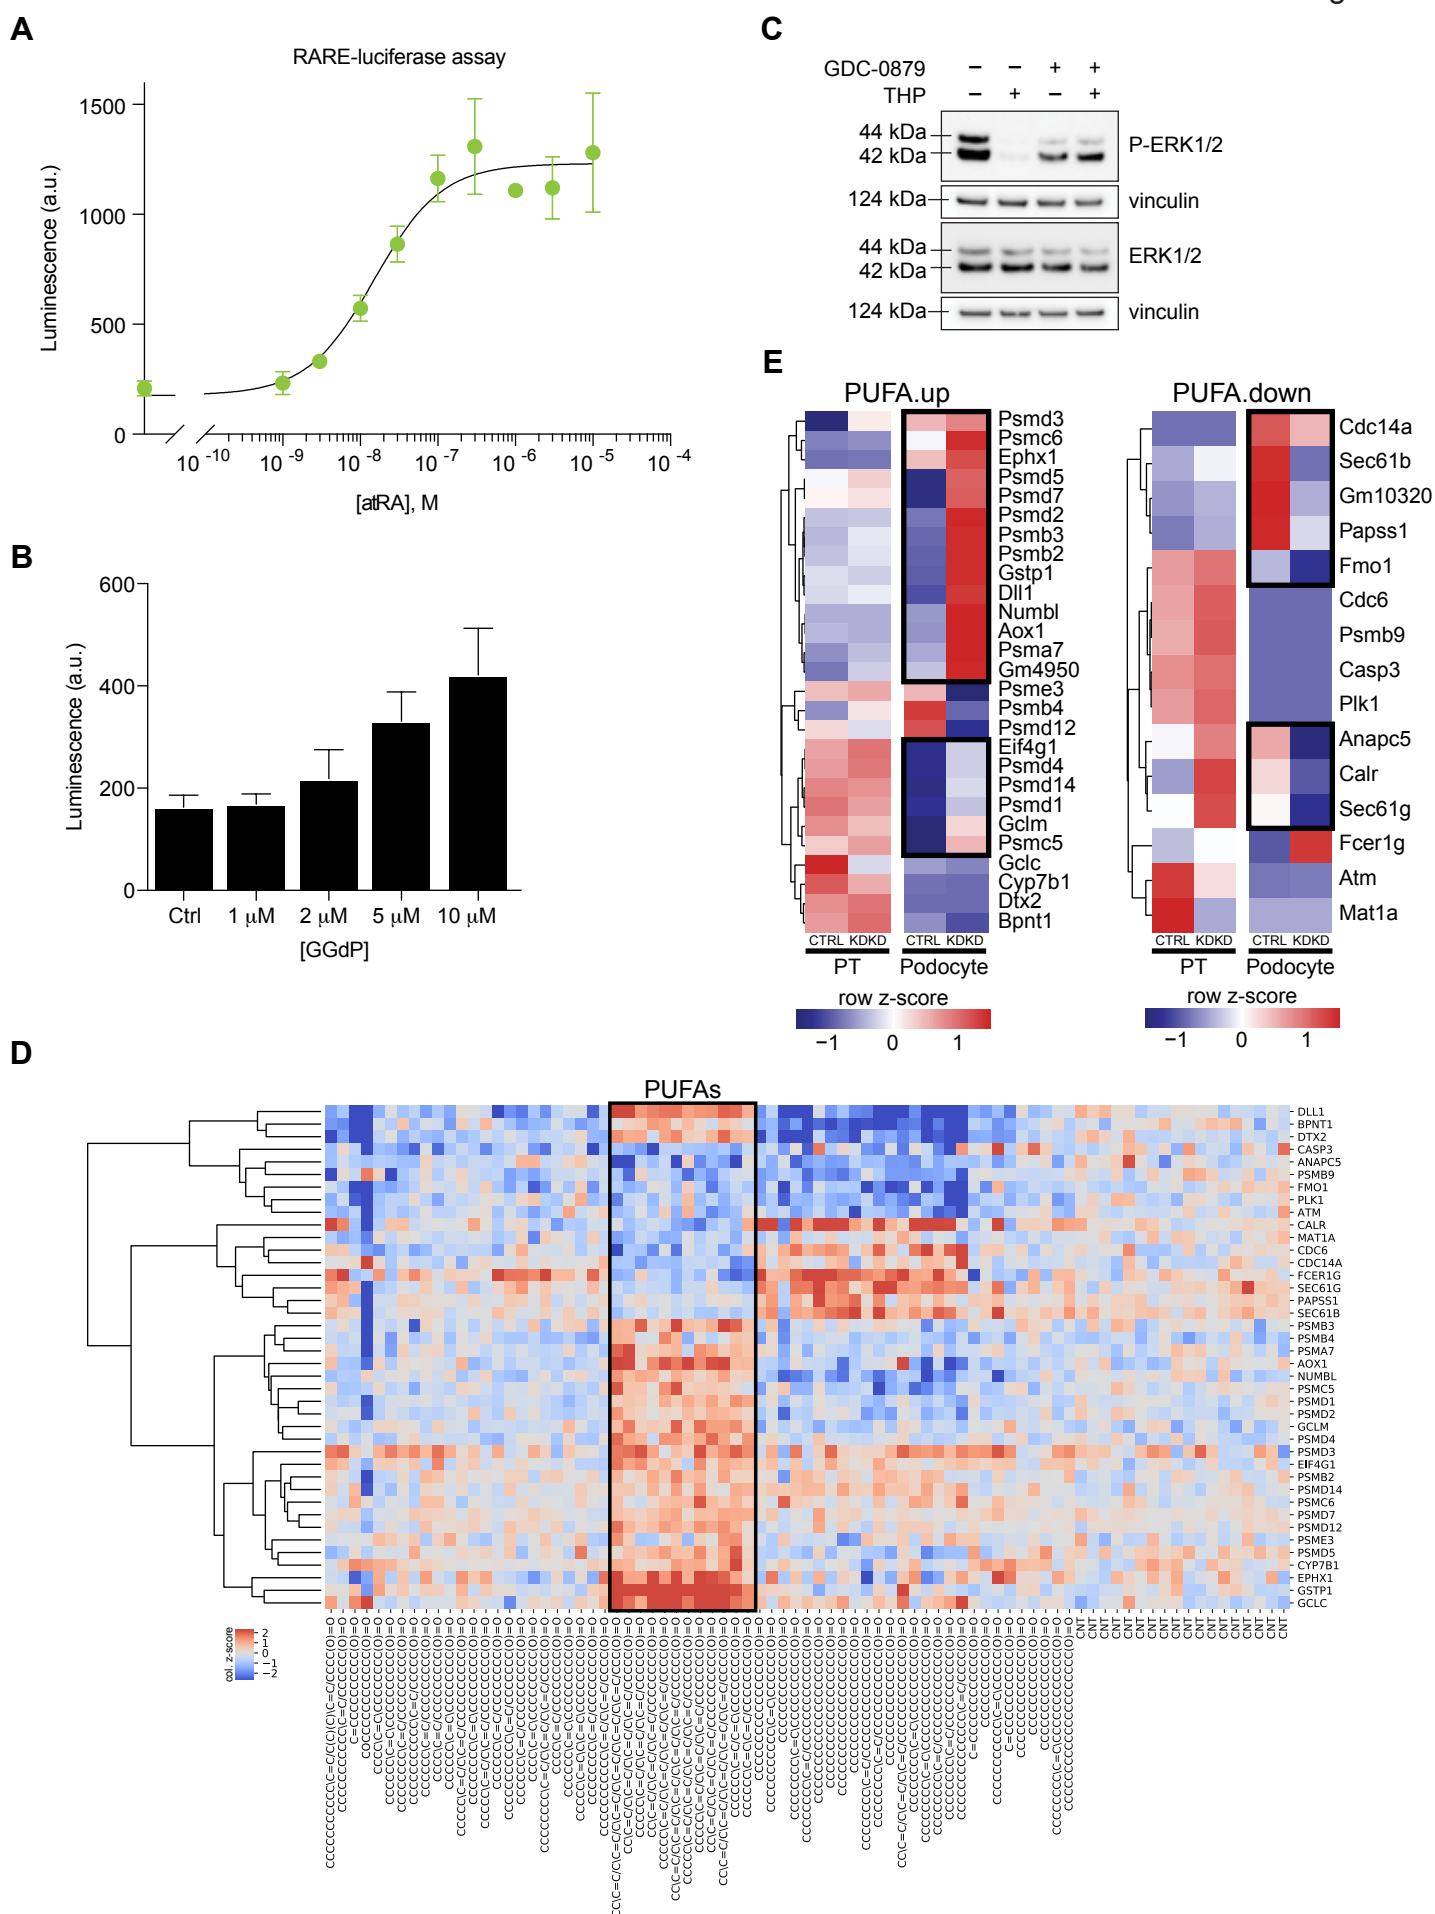

**Figure S8. GGdP increases Rar-mediated transcription in a dose-responsive manner, CoQ-deficient mice reveal podocyte-specific changes in PUFA-related genes, and Gpx4 immunofluorescence quantification.** **A,B.** Luminescence readout from a Retinoic Acid Receptor Element (RARE)-luciferase reporter assay following 24 hours treatment with **A.** atRA,  $n=3$  or **B.** GGdP,  $n=6$ , showing that both increase Rar-mediated transcription in a dose-responsive manner. **C.** Western blot of phospho-ERK1/2 (P-ERK1/2) and total ERK1/2 which shows decreased ERK1/2 phosphorylation following treatment with thapsigargin (2.5  $\mu$ M) and reversed with GDC-0879 (10  $\mu$ M). **D.** Heatmap of average gene expression of genes used to create PUFA transcriptomic signatures in original dataset of 61 free fatty acids in MIN6 cells, demonstrating selected genes are either up- or down-regulated specifically among PUFAs. **E.** Heatmap of average gene expression of genes used to create the PUFA upregulated gene signature (PUFA up) and PUFA downregulated gene signature (PUFA down) across podocyte and combined proximal tubule cells in control versus *Pdss2*<sup>kd/kd</sup> mice.

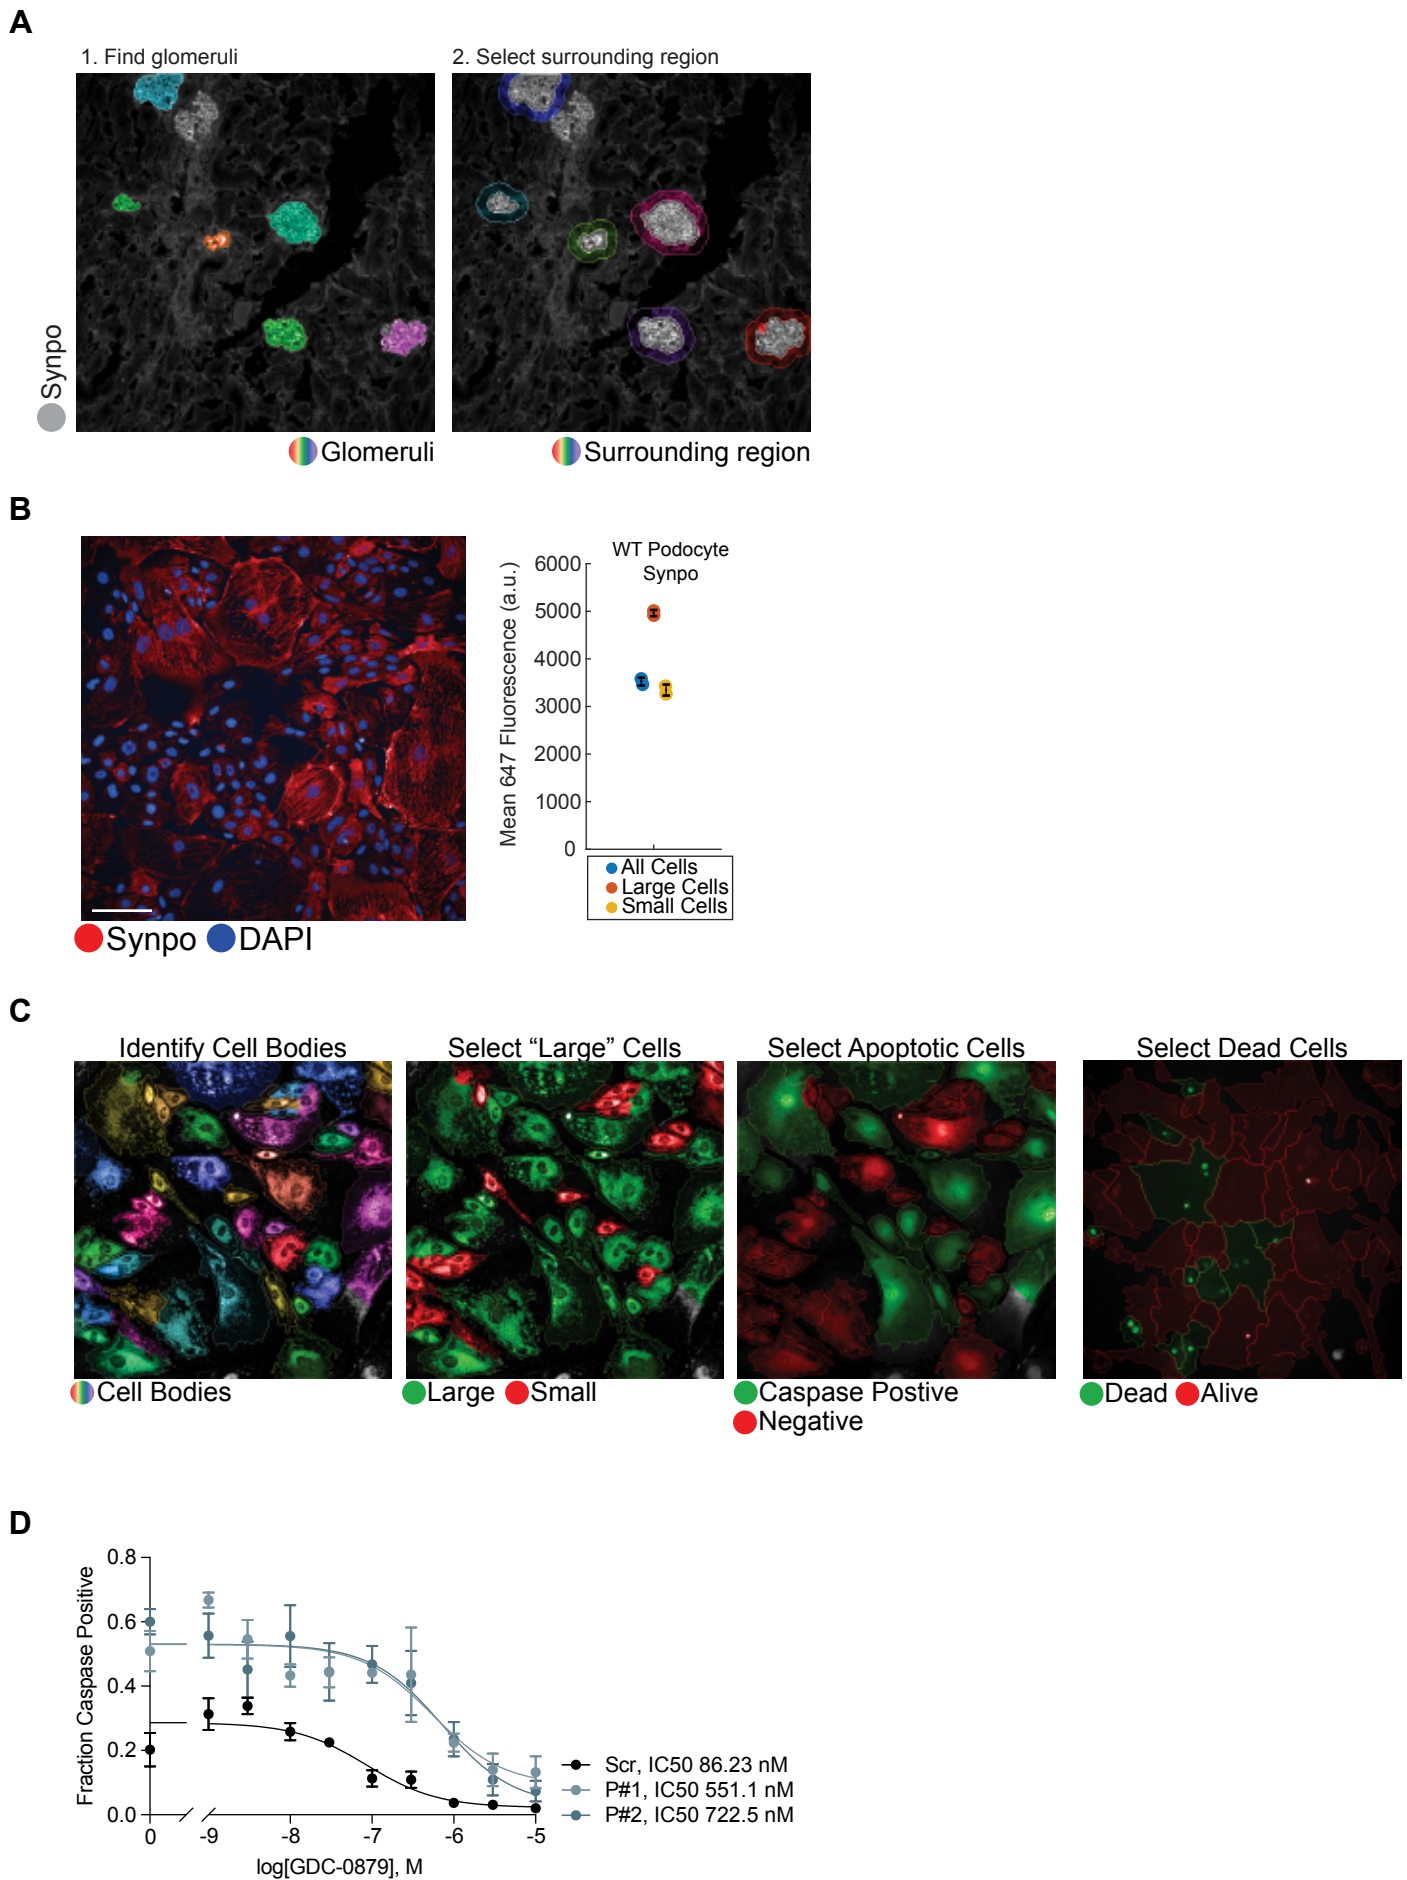

**Figure S9. Image analysis using Opera Phenix High-Content Screening System and Harmony software.**

**A.** Analysis of immunofluorescence by Harmony software demonstrating identification of glomeruli, based on Synpo expression, and surrounding regions for Gpx4 quantification. **B.** Immunofluorescence of synaptopodin (Synpo, red) with nuclei staining (DAPI, blue) and quantification by cell size showing larger cells have increased expression of synaptopodin (SYNPO) suggesting further podocyte maturation; scale bars, 100  $\mu$ m. **C.** Analysis of live cell imaging by Harmony software demonstrating identification of cell bodies, selection of cells based on size, and selection of apoptotic (caspase positive) and dead cells. **D.** Dose-response curve for GDC-0879 inhibition of podocyte apoptosis in vitro, n=4, IC<sub>50</sub> for each condition determined using a nonlinear least squares fit.

Full unedited Gel for Figure S6A

Pdss2 antibody

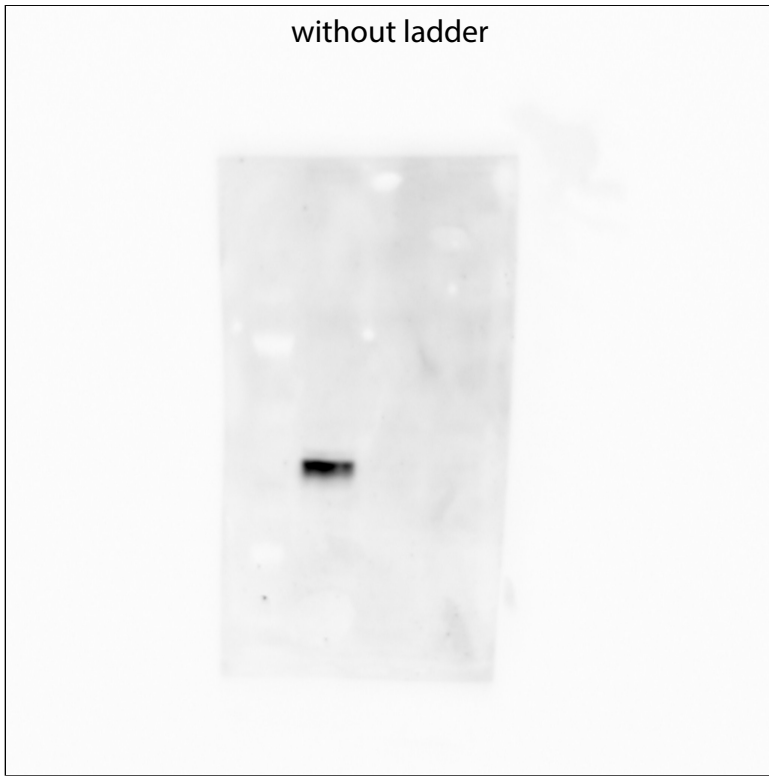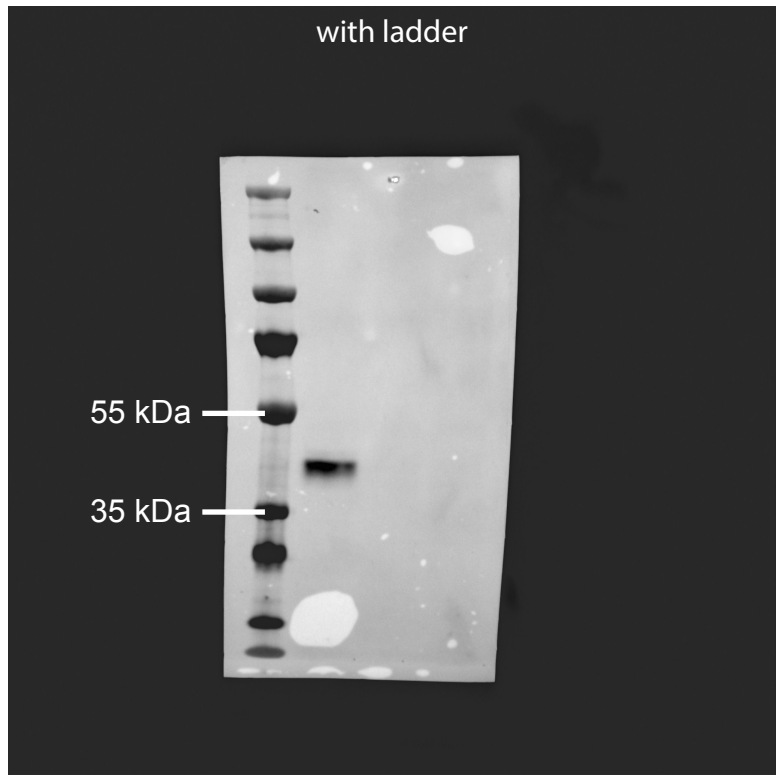

Gapdh antibody

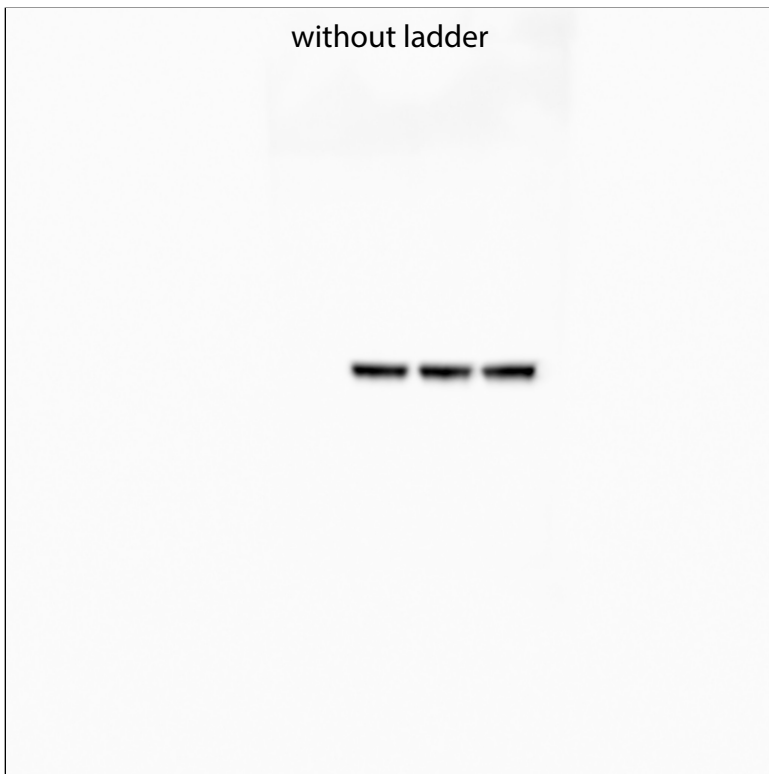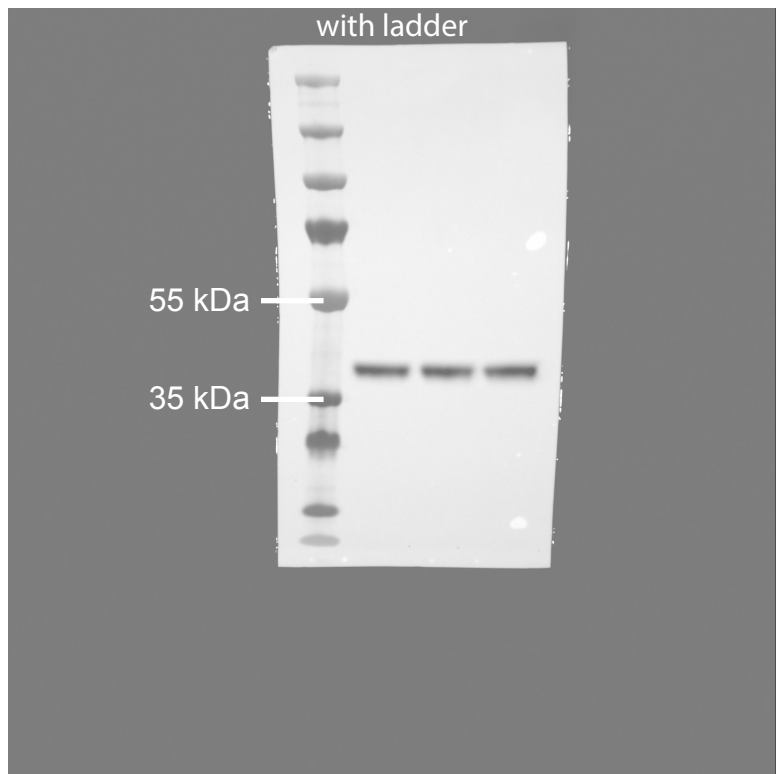



Full unedited Gels for Figure 4G

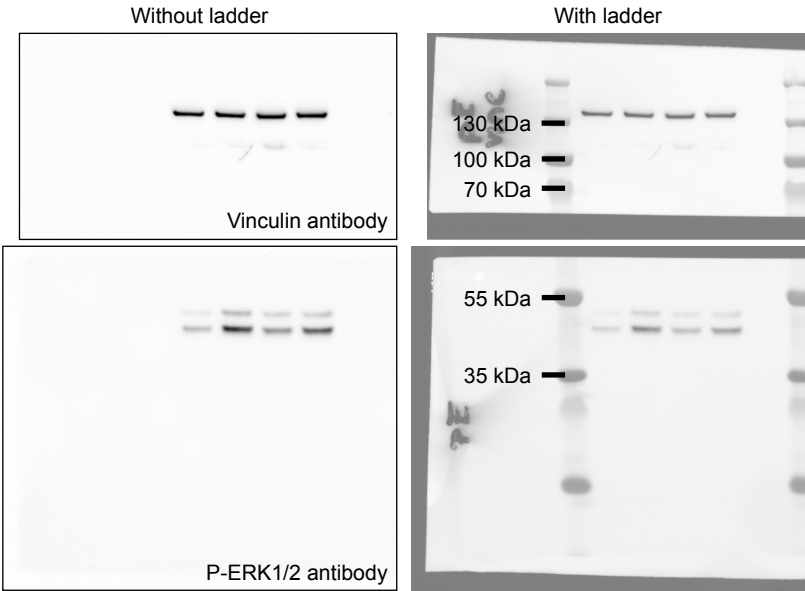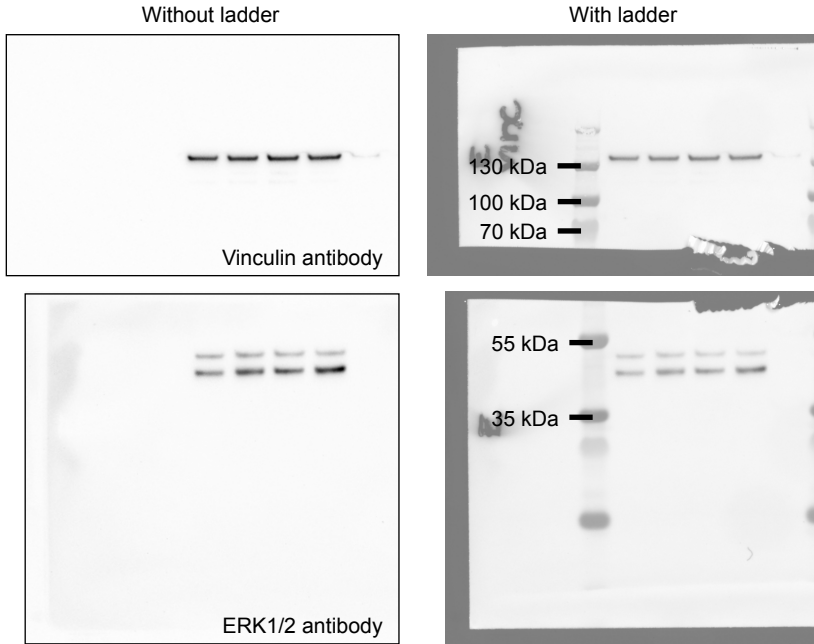

Full unedited Gels for Figure S8C

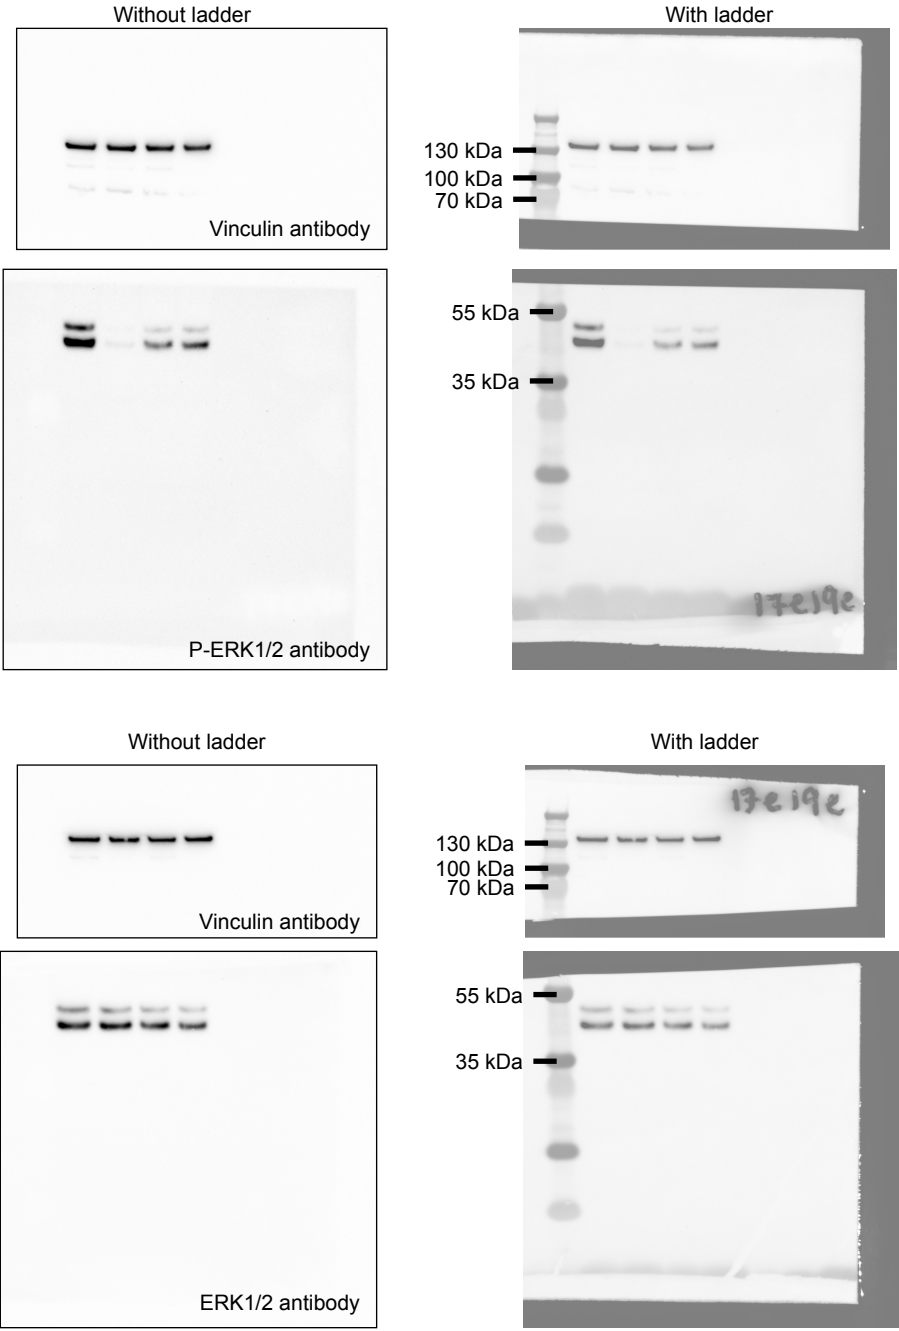

Supplement: jci-131-141380-s103.pdf [file jci-131-141380-s103.pdf]
